# Supplementary material for: CVD-Grown 2D Nonlayered NiSe as a Broadband Photodetector
Source: MDPI journal article supplement (doi:10.3390/mi12091066), 2021-09-01
Supplement: s1 [file s1]

# Supplementary Materials: CVD-Grown 2D Nonlayered NiSe as a Broadband Photodetector

Fang Liang <sup>1</sup>, Liangliang Zhan <sup>1</sup>, Tianyu Guo <sup>1</sup>, Xing Wu <sup>1,\*</sup> and Junhao Chu <sup>1,2,\*</sup>

<sup>1</sup> Shanghai Key Laboratory of Multidimensional Information Processing, School of Communication and Electronic Engineering, East China Normal University, Shanghai, 200241, China; 52161213023@stu.ecnu.edu.cn (F.L.); 10192100477@stu.ecnu.edu.cn (L.Z.); 10182100136@stu.ecnu.edu.cn (T.G.)

<sup>2</sup> State Key Laboratory of Infrared Physics, Shanghai Institute of Technical Physics, Chinese Academy of Sciences, 500 Yutian Road, Shanghai, 200083, China

\* Correspondence: xwu@cee.ecnu.edu.cn (X.W.); jhchu@mail.sitp.ac.cn (J.C.); Tel.: +86-189-1818-0597 (X.W.)

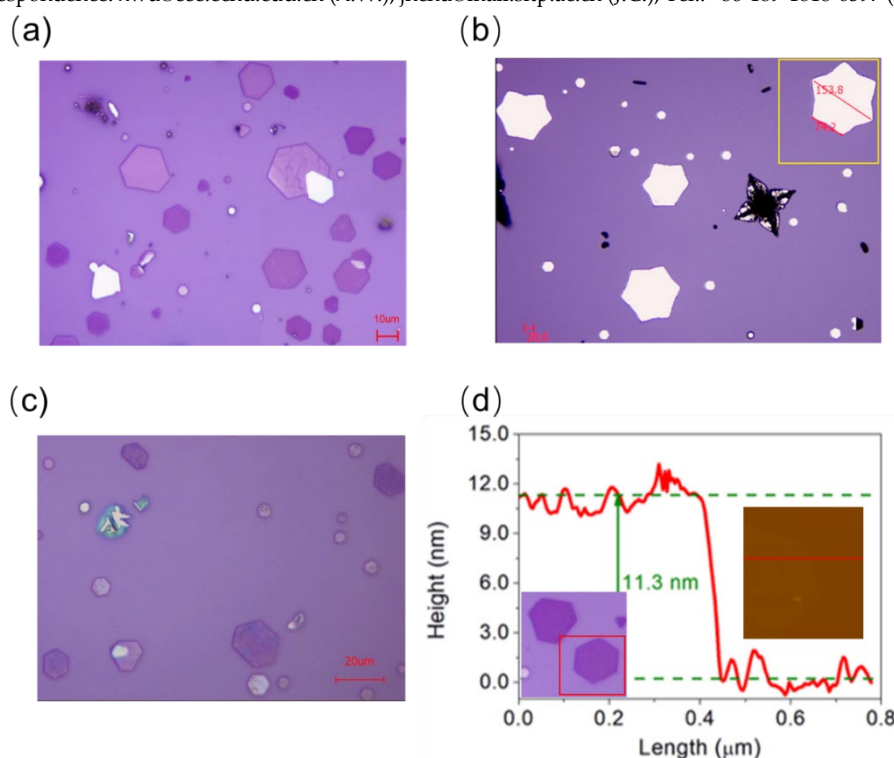

**Figure S1** The optical images and AFM results of grown NiSe flakes. **(a)** The optical images of NiSe flakes with different morphologies. **(b)** The optical image of NiSe flakes with 153.8 μm. **(c)** The optical image of NiSe flakes grown one month ago. **(d)** The optical image of thinner NiSe flake and the corresponding AFM result with height profile and recognition image.

**Table S1.** The summaries of nonlayered materials-based photodetectors.

| Materials                                | Laser wavelength (nm) | Voltage (V) | R (A/W)               | D* (Jones)            | Ref.      |
|------------------------------------------|-----------------------|-------------|-----------------------|-----------------------|-----------|
| PdS                                      | 400                   | 2           | 0.05                  | $7.81 \times 10^8$    | [1]       |
| CdTe                                     | 473                   | 1           | $0.6 \times 10^{-3}$  | -                     | [2]       |
| $\beta$ -In <sub>2</sub> S <sub>3</sub>  | 450                   | 1           | 137                   | $4.74 \times 10^{10}$ | [3]       |
| Te                                       | 350                   | 0.6         | $1.34 \times 10^{-5}$ | $3.1 \times 10^7$     | [4]       |
| Pb <sub>1-x</sub> Sn <sub>x</sub> Se     | 473                   | 2           | 5.95                  | -                     | [5]       |
| $\gamma$ -Ga <sub>2</sub> S <sub>3</sub> | 350                   | 1           | 61.3                  | $1.52 \times 10^{10}$ | [6]       |
| ZnSb                                     | 1550                  | 0.5         | 89.2                  | $1.7 \times 10^{10}$  | [7]       |
| CoSe                                     | $10.6 \times 10^3$    | 1           | 2.58                  | $3.3 \times 10^9$     | [8]       |
| NiSe                                     | $10.6 \times 10^3$    | 0.1         | 6.96                  | $2.3 \times 10^7$     | This work |

## References

1. Jin, B.; Huang, P.; Zhang, Q.; Zhou, X.; Zhang, X.; Li, L.; Su, J.; Li, H.; Zhai, T., Self-Limited Epitaxial Growth of Ultrathin Nonlayered CdS Flakes for High-Performance Photodetectors. *Advanced Functional Materials* **2018**, 28, (20), 1800181.
2. Cheng, R.; Wen, Y.; Yin, L.; Wang, F.; Wang, F.; Liu, K.; Shifa, T. A.; Li, J.; Jiang, C.; Wang, Z.; He, J., Ultrathin Single-Crystalline CdTe Nanosheets Realized via Van der Waals Epitaxy. *Adv Mater* **2017**, 29, (35).
3. Huang, W.; Gan, L.; Yang, H.; Zhou, N.; Wang, R.; Wu, W.; Li, H.; Ma, Y.; Zeng, H.; Zhai, T., Controlled Synthesis of Ultrathin 2D  $\beta$ -In<sub>2</sub>S<sub>3</sub> with Broadband Photoresponse by Chemical Vapor Deposition. *Advanced Functional Materials* **2017**, 27, (36), 1702448.
4. Xie, Z.; Xing, C.; Huang, W.; Fan, T.; Li, Z.; Zhao, J.; Xiang, Y.; Guo, Z.; Li, J.; Yang, Z.; Dong, B.; Qu, J.; Fan, D.; Zhang, H., Ultrathin 2D Nonlayered Tellurium Nanosheets: Facile Liquid-Phase Exfoliation, Characterization, and Photoresponse with High Performance and Enhanced Stability. *Advanced Functional Materials* **2018**, 28, (16), 1705833.
5. Wang, Q.; Xu, K.; Wang, Z.; Wang, F.; Huang, Y.; Safdar, M.; Zhan, X.; Wang, F.; Cheng, Z.; He, J., van der Waals epitaxial ultrathin two-dimensional nonlayered semiconductor for highly efficient flexible optoelectronic devices. *Nano Lett* **2015**, 15, (2), 1183-9.
6. Zhou, N.; Gan, L.; Yang, R.; Wang, F.; Li, L.; Chen, Y.; Li, D.; Zhai, T., Nonlayered Two-Dimensional Defective Semiconductor gamma-Ga<sub>2</sub>S<sub>3</sub> toward Broadband Photodetection. *ACS Nano* **2019**, 13, (6), 6297-6307.
7. Chai, R.; Chen, Y.; Zhong, M.; Yang, H.; Yan, F.; Peng, M.; Sun, Y.; Wang, K.; Wei, Z.; Hu, W.; Liu, Q.; Lou, Z.; Shen, G., Non-layered ZnSb nanoplates for room temperature infrared polarized photodetectors. *Journal of Materials Chemistry C* **2020**, 8, (19), 6388-6395.
8. Liang, F.; Wang, C.; Luo, C.; Xia, Y.; Wang, Y.; Xu, M.; Wang, H.; Wang, T.; Zhu, Y.; Wu, P.; Ye, J.; Mu, G.; Zhu, H.; Wu, X., Ferromagnetic CoSe broadband photodetector at room temperature. *Nanotechnology* **2020**, 31, (37), 374002.
